# Supplementary material
Source: publisher figshare collection journal article supplement (https://tandf.figshare.com/ndownloader/files/1868298)
Supplement: Supplementary file 1 [file 1868298]

**SUPPORTING INFORMATION**

Figure S1. Lixiviation of the tracer Bromide-ion in soil columns packed with sandy soil S1 and silty clay loam soil S2 unamended and amended with winery vermicomposts (V1 and V2).

**V/Vo**
